# Supplementary material for: Malocclusions and Dental Diseases in Privately Owned Horses in the Mazovia Region of Poland
Source: MDPI journal article supplement (doi:10.3390/ani12223120), 2022-11-11
Supplement: s1 [file s1]

# **Malocclusions and Dental Diseases in Privately Owned Horses in the Mazovia Region of Poland**

**Kamil Górski <sup>1,\*</sup>, Elżbieta Stefanik <sup>1</sup>, Bernard Turek <sup>1</sup>, Andrzej Bereznowski <sup>2</sup>, Michał Czopowicz <sup>2</sup>, Izabela Polkowska <sup>3</sup> and Małgorzata Domino <sup>1,\*</sup>**

<sup>1</sup> Department of Large Animal Diseases and Clinic, Institute of Veterinary Medicine, Warsaw University of Life Sciences, 02-787 Warsaw, Poland

<sup>2</sup> Department of Veterinary Epidemiology and Economics, Faculty of Veterinary Medicine, Warsaw University of Life Sciences, 02-787 Warsaw, Poland

<sup>3</sup> Department and Clinic of Animal Surgery, Faculty of Veterinary Medicine, University of Life Sciences in Lublin, 20-950 Lublin, Poland

\* Correspondence: kamil\_gorski@sggw.edu.pl (K.G.); malgorzata\_domino@sggw.edu.pl (M.D.); Tel.: +48-22-593-61-91 (M.D.)

# EQUINE DENTAL CHART

|         |      |                  |       |       |
|---------|------|------------------|-------|-------|
| Date    | Name | Age              | Sex   | Breed |
| Color   | Use  | Last examination |       |       |
| Owner   |      | History          |       |       |
| Address |      |                  | Phone |       |

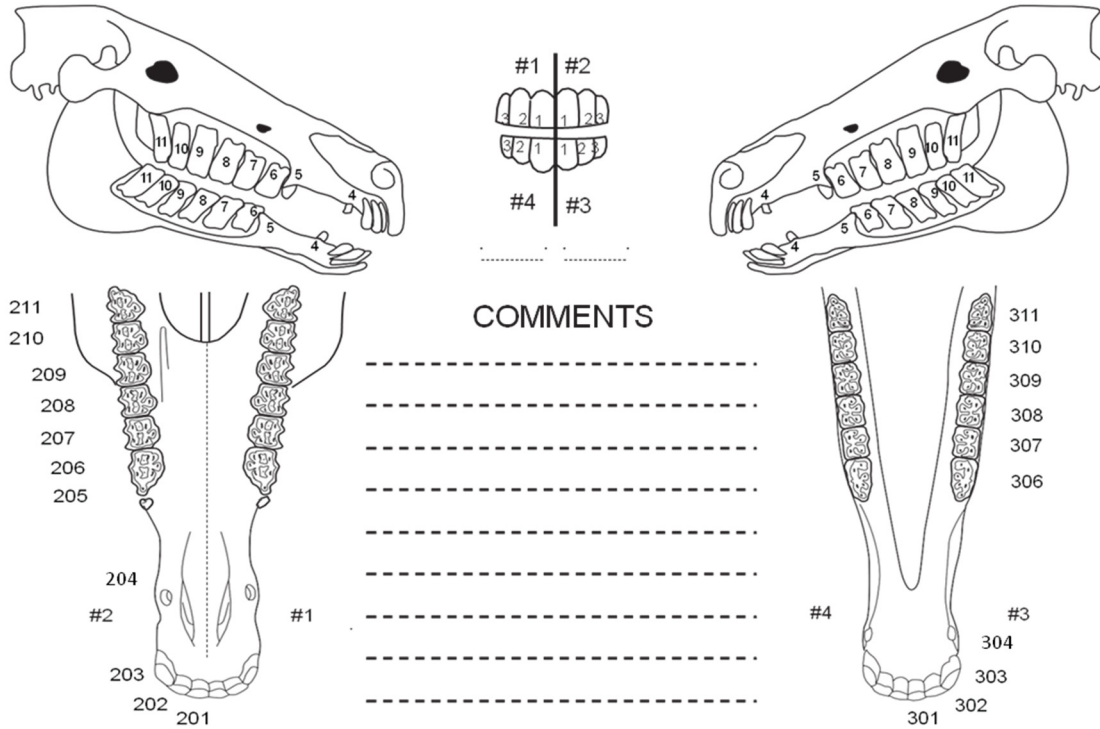

| INCISORS                                                                                                                                                                                                                                                                                                                                                                                                                                                                                                            | CANINES                                                                                                                                                                                                                                                                                                                               | WOLF TEETH                                                                                                                                                                   | PREMOLARS/ MOLARS                                                                                                                                                                                                                                                                                                                        |                                                                                                                                                                                                                                                                                                                                                            |
|---------------------------------------------------------------------------------------------------------------------------------------------------------------------------------------------------------------------------------------------------------------------------------------------------------------------------------------------------------------------------------------------------------------------------------------------------------------------------------------------------------------------|---------------------------------------------------------------------------------------------------------------------------------------------------------------------------------------------------------------------------------------------------------------------------------------------------------------------------------------|------------------------------------------------------------------------------------------------------------------------------------------------------------------------------|------------------------------------------------------------------------------------------------------------------------------------------------------------------------------------------------------------------------------------------------------------------------------------------------------------------------------------------|------------------------------------------------------------------------------------------------------------------------------------------------------------------------------------------------------------------------------------------------------------------------------------------------------------------------------------------------------------|
| <input type="checkbox"/> Underbite/Underjet<br><input type="checkbox"/> Overbite/Overjet<br><input type="checkbox"/> Ventral curvature<br><input type="checkbox"/> Dorsal curvature<br><input type="checkbox"/> Slant curvature<br><input type="checkbox"/> Irregular curvature<br><input type="checkbox"/> Fracture<br><input type="checkbox"/> Supernumerary<br><input type="checkbox"/> Missing<br><input type="checkbox"/> Calculus<br><input type="checkbox"/> Periodontitis<br><input type="checkbox"/> Other | <input type="checkbox"/> Normal<br><input type="checkbox"/> Missing<br><input type="checkbox"/> Shortened<br><input type="checkbox"/> Rounded<br><input type="checkbox"/> Calculus<br><input type="checkbox"/> Fracture<br><input type="checkbox"/> Blind<br><input type="checkbox"/> Periodontitis<br><input type="checkbox"/> Other | <input type="checkbox"/> Present<br><input type="checkbox"/> Missing<br><input type="checkbox"/> Blind<br><input type="checkbox"/> Extract<br><input type="checkbox"/> Other | <input type="checkbox"/> Normal<br><input type="checkbox"/> Sharp points<br><input type="checkbox"/> Wave<br><input type="checkbox"/> Stepped<br><input type="checkbox"/> Shear<br><input type="checkbox"/> Hooks<br><input type="checkbox"/> ETR<br><input type="checkbox"/> Erosion / Ulcers<br><input type="checkbox"/> Periodontitis | <input type="checkbox"/> Cap<br><input type="checkbox"/> Cap fragments<br><input type="checkbox"/> Angled<br><input type="checkbox"/> Mobile<br><input type="checkbox"/> Protuberant<br><input type="checkbox"/> Supernumerary<br><input type="checkbox"/> Missing<br><input type="checkbox"/> Fracture<br><input type="checkbox"/> Other<br>Stage 1 2 3 4 |

Sedation: .....

Re-examination recommended: .....

**Figure S1.** An equine dental chart used during the detailed dental examination.

**Table S1.** The definitions of selected disorder (malocclusions and dental diseases) of the incisor teeth.

| Name                   | Definition                                                                                                                                                                                                                                                                                                   |
|------------------------|--------------------------------------------------------------------------------------------------------------------------------------------------------------------------------------------------------------------------------------------------------------------------------------------------------------|
| <i>Malocclusions</i>   |                                                                                                                                                                                                                                                                                                              |
| underbite              | an occlusal aspects of the mandibular incisors lie rostral to the occlusal aspects of the maxillary incisors, with contact between teeth [45];                                                                                                                                                               |
| overbite               | an occlusal aspects of the maxillary incisors lie rostral to the occlusal aspects of the mandibular incisors, with contact between teeth [45]. Protrusion of the maxillary incisor teeth rostrally and horizontally beyond the limits of the mandibular incisor teeth from centric occlusion [42];           |
| curvature              | an irregularities of the occlusal surface of the incisors: the occlusal line formed by the maxillary and mandibular incisors should lie in a horizontal plane, parallel to the ground. All other configurations, i.e. ventral, dorsal, diagonal, and irregular curvature are considered as abnormal [43,44]; |
| diastema               | a diastema is defined as a detectable abnormal interdental (interproximal) space between 2 adjacent teeth [57] with or without food impaction and may be the cause of painful dental disease in horses [57];                                                                                                 |
| oligodontia            | a reduced number of teeth. Can be developmental, as a result of an inappropriate differentiation of dental lamina and tooth germ, or may occur during the animal's lifetime, due to traumatic causes, age, or secondary to other dental disorders [45];                                                      |
| polydontia             | a presence of teeth in excess of the normal dental formula, as a result of an inappropriate differentiation of dental germinal tissue during gestational development, with external trauma also acting as an initiating factor, when teeth germs are affected [45];                                          |
| RDT                    | a tooth remaining in the oral cavity longer than physiologically appropriate. After this period, the milk tooth (incisor, premolar) remaining in the oral cavity is considered to be persistent [57];                                                                                                        |
| EOTRH                  | a teeth-damaging and pain-causing, mainly affecting a horse's incisors and less frequently their canines, premolars, and molars. The etiopathogenesis of the illness has not been fully recognized [53];                                                                                                     |
| hooks                  | a protuberant crown longer than it is wide [50].                                                                                                                                                                                                                                                             |
| <i>Dental diseases</i> |                                                                                                                                                                                                                                                                                                              |
| supernumerary          | a presence of an extra incisor tooth in excess of the normal number for horses [46];                                                                                                                                                                                                                         |
| loose teeth            | a very pronounced, excessive tooth mobility, most often associated with the presence of diastema, advanced periodontitis, and accumulation of food contents [46,50];                                                                                                                                         |
| fractures              | a typically caused by traumatic injuries, affecting some or all of the tooth fragments (clinical crown, reserve crown, root) [57];                                                                                                                                                                           |
| caries                 | a destruction of infundibular calcified dental tissues, due to demineralization and bacterial infection (erosions and dark discolouration) of its cementum with or without extension of caries to the enamel and dentine [57];                                                                               |
| calculus               | an accumulation of tartar; occurs as a result of the mineralization of the bacterial plaque flora on the teeth [50].                                                                                                                                                                                         |

RDT - retained deciduous teeth; EOTRH - Equine Odontoclastic Tooth Resorption and Hypercementosis syndrome.

**Table S2.** The definitions of selected disorder (malocclusion and dental diseases) of the canine teeth.

| Name                   | Definition                                                                                                                         |
|------------------------|------------------------------------------------------------------------------------------------------------------------------------|
| <i>Malocclusion</i>    |                                                                                                                                    |
| non-erupted canines    | a tooth which has not protruded above the gingival surface and the horse is 6 years old [57].                                      |
| <i>Dental diseases</i> |                                                                                                                                    |
| fractures              | a typically caused by traumatic injuries, affecting some or all of the tooth fragments (clinical crown, reserve crown, root) [57]; |
| calculus               | an accumulation of tartar; occurs as a result of the mineralization of the bacterial plaque flora on the teeth [50].               |

**Table S3.** The definitions of selected disorder (malocclusion and dental disease) of the wolf teeth.

| Name                  | Definition                                                                                                                                      |
|-----------------------|-------------------------------------------------------------------------------------------------------------------------------------------------|
| <i>Malocclusion</i>   |                                                                                                                                                 |
| blind wolf tooth      | a hidden wolf tooth, first premolar referred to as a brachydont tooth and considered vestigial, as it failed to molarize during evolution [46]. |
| <i>Dental disease</i> |                                                                                                                                                 |
| fractures             | a typically caused by traumatic injuries, affecting some or all of the tooth fragments (clinical crown, reserve crown, root) [57].              |

**Table S4.** The definitions of selected disorder (malocclusions and dental diseases) of the cheek (premolar and molar) teeth.

| Name                 | Definition                                                                                                                                                                                                                                                          |
|----------------------|---------------------------------------------------------------------------------------------------------------------------------------------------------------------------------------------------------------------------------------------------------------------|
| <i>Malocclusions</i> |                                                                                                                                                                                                                                                                     |
| sharp enamel points  | a presence of protruding enamel points on the buccal edges of maxillary teeth and lingual edges of the mandibular teeth, which develop as a result of anisognathism and the equid's masticatory action [57];                                                        |
| overgrow tooth       | a tooth that has not been exposed to normal wear, most commonly secondary to loss or excessive wear of the opposing tooth; involves individual teeth [55,57];                                                                                                       |
| wave mouth           | an unequal or corrugated appearance of the occlusal surface in a rostrocaudal direction or more than one tooth with excess crown in a single arcade [46,50];                                                                                                        |
| step mouth           | a supra-eruption, classically rectangular shape of individual teeth, usually opposite to a missing teeth [14];                                                                                                                                                      |
| displaced teeth      | a variation of the physiological position inside the teeth arch. Tooth displaced in a buccal (premolars and molars) or distal (incisors) direction [22,46];                                                                                                         |
| diastema             | a diastema is defined as a detectable abnormal interdental (interproximal) space between 2 adjacent teeth [57] with or without food impaction and may be the cause of painful dental disease in horses [57];                                                        |
| oligodontia          | a reduced number of teeth. Can be developmental, as a result of an inappropriate differentiation of dental lamina and tooth germ, or may occur during the animal's lifetime, due to traumatic causes, age, or secondary to other dental disorders [45];             |
| polydontia           | a presence of teeth in excess of the normal dental formula, as a result of an inappropriate differentiation of dental germinal tissue during gestational development, with external trauma also acting as an initiating factor, when teeth germs are affected [45]; |
| RDT                  | a tooth remaining in the oral cavity longer than physiologically appropriate. After this period, the milk tooth (incisor, premolar) remaining in the oral cavity is considered to be persistent [55,57];                                                            |
| ETR                  | a transverse edges on the rubbing surface of the tooth which are at least 3 mm in height [50]. ETR may lead to more severe dental diseases such as diastema and periodontal disease because of the ridges forcing feed interproximally in                           |

|                                                                    |                                                                                                                                                                                                                                                                                                 |
|--------------------------------------------------------------------|-------------------------------------------------------------------------------------------------------------------------------------------------------------------------------------------------------------------------------------------------------------------------------------------------|
| hooks                                                              | the opposing arcade during mastication [55];<br>a protuberant crown longer than it is wide [50]; it is most commonly found on teeth 06 or 11 and is often associated with a mismatch between the length of the occlusal surfaces of the maxilla and mandible (undershot or overshot bite) [46]. |
| <i>Dental diseases</i>                                             |                                                                                                                                                                                                                                                                                                 |
| loose teeth                                                        | a very pronounced, excessive tooth mobility, most often associated with the presence of diastema, advanced periodontitis, and accumulation of food contents [46,50];                                                                                                                            |
| fractures                                                          | a typically caused by traumatic injuries, affecting some or all of the tooth fragments (clinical crown, reserve crown, root) [57];                                                                                                                                                              |
| caries                                                             | a destruction of infundibular calcified dental tissues, due to demineralization and bacterial infection (erosions and dark discolouration) of its cementum with or without extension of caries to the enamel and dentine [57];                                                                  |
| calculus                                                           | an accumulation of tartar; occurs as a result of the mineralization of the bacterial plaque flora on the teeth [50].                                                                                                                                                                            |
| RDT - retained deciduous teeth; ETR - excessive transverse ridges. |                                                                                                                                                                                                                                                                                                 |
